# Supplementary material for: Low temperature atomic layer deposition of cobalt using dicobalt hexacarbonyl-1-heptyne as precursor
Source: PubMed Central journal article supplement (PMC10509559; doi:10.3762/bjnano.14.78), 2023-09-15
Supplement: Beilstein_J_Nanotechnol-14-951-s001.pdf [file Beilstein_J_Nanotechnol-14-951-s001.pdf]

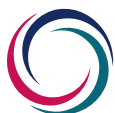

## Supporting Information

for

### Low temperature atomic layer deposition of cobalt using dicobalt hexacarbonyl-1-heptyne as precursor

Mathias Franz, Mahnaz Safian Jouzdani, Lysann Kaßner, Marcus Daniel, Frank Stahr and Stefan E. Schulz

*Beilstein J. Nanotechnol.* **2023**, *14*, 951–963. [doi:10.3762/bjnano.14.78](https://doi.org/10.3762/bjnano.14.78)

### Additional figures with XPS and ellipsometry raw data

## Preliminary Experiments in CVD mode

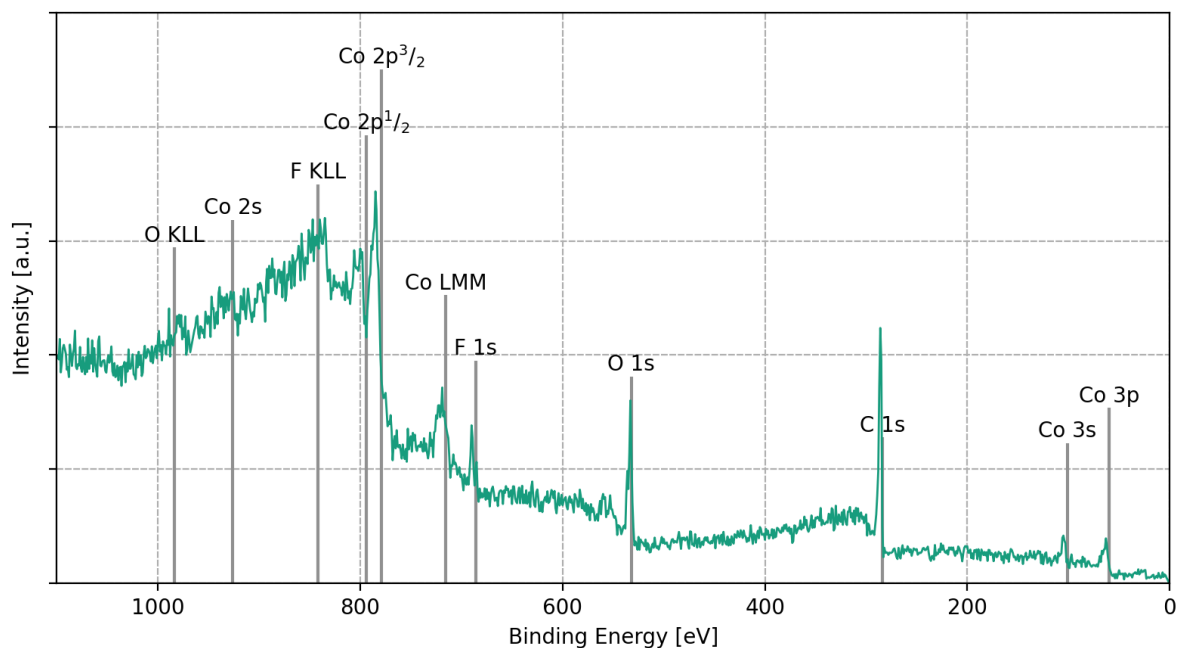

**Figure S1:** XPS overview spectrum of CVD film deposited at 150 °C and the relevant elemental binding energies and Auger transitions for the measured elements.

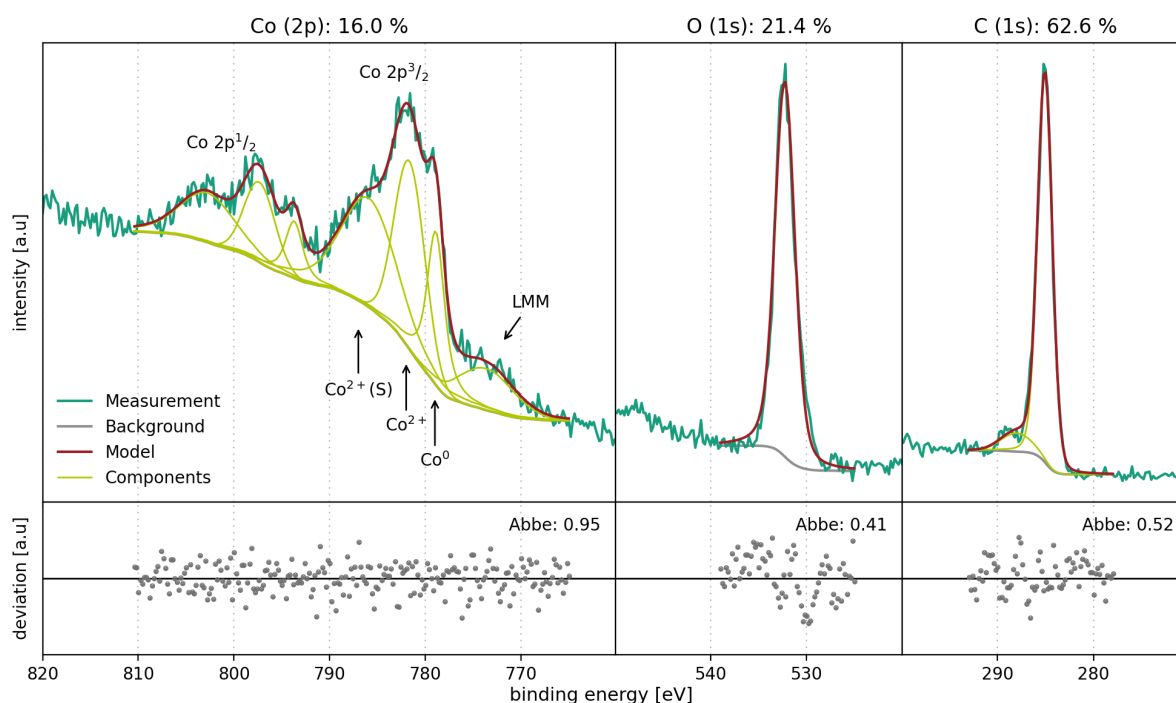

**Figure S2:** XPS measurements of CVD film deposited at 150 °C. The peaks for the O 1s and C 1s transitions were fitted with just one Voigt curve per main feature.

## ALD with $[\text{Co}_2(\text{CO})_6\text{HC}\equiv\text{CC}_5\text{H}_{11}]$ and $\text{H}_2$ plasma

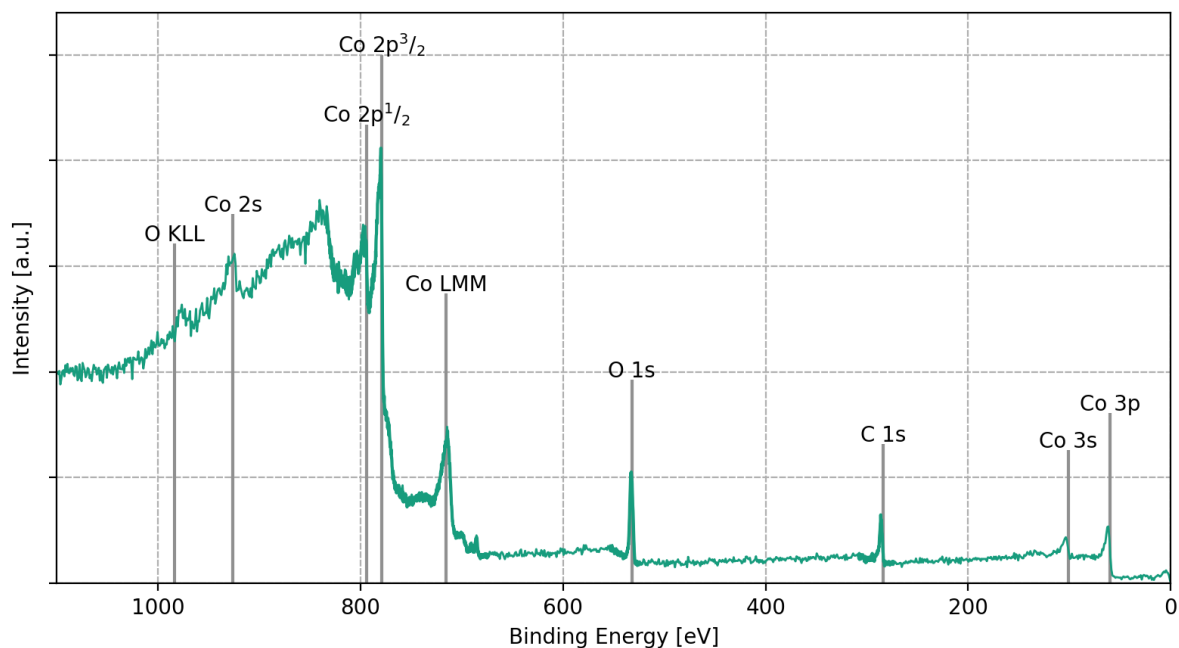

**Figure S3:** XPS overview spectrum of ALD film deposited at 35 °C and the relevant elemental binding energies and Auger transitions for the measured elements.

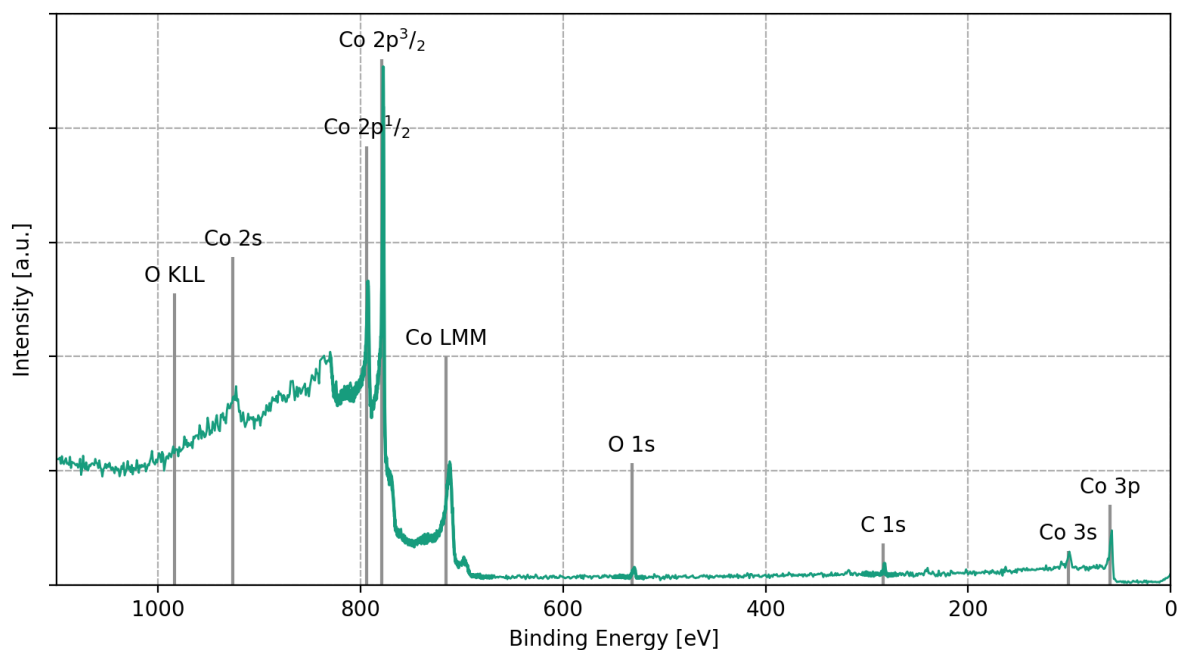

**Figure S4:** XPS overview spectrum of ALD film deposited at 85 °C and the relevant elemental binding energies and Auger transitions for the measured elements.

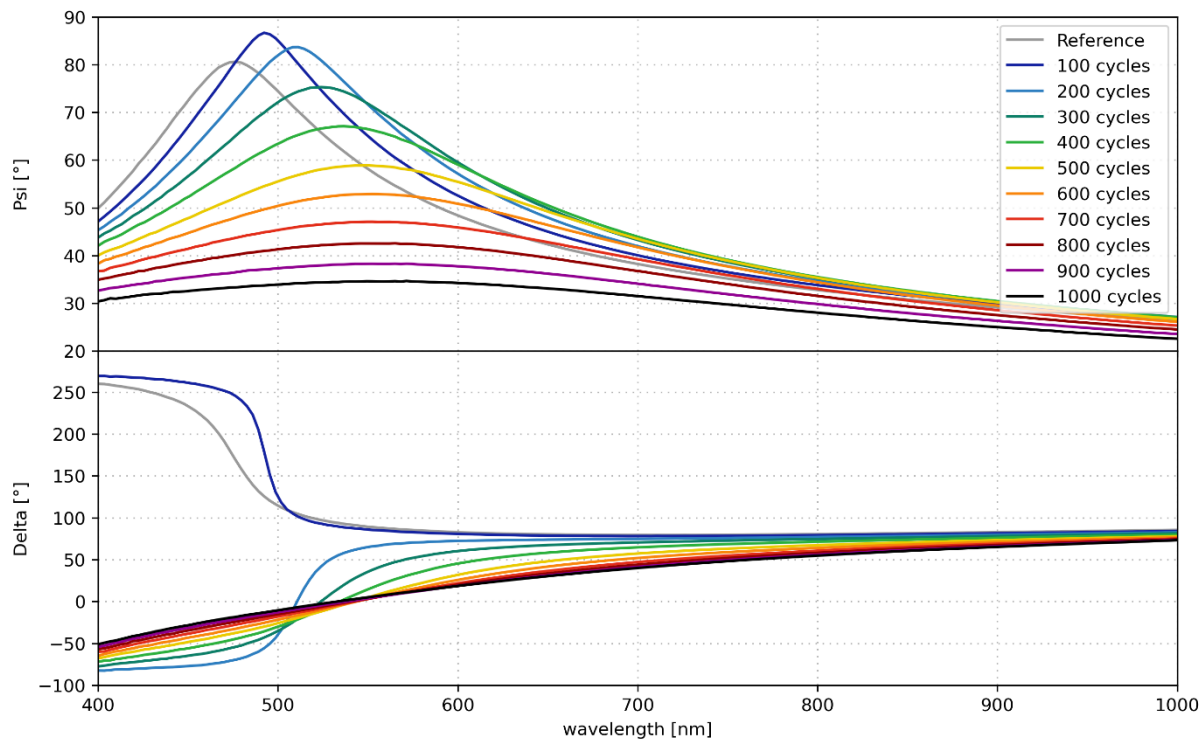

**Figure S5:** Ellipsometry raw data for ALD at 85 °C on 100 nm SiO<sub>2</sub>.
